# Supplementary material for: Detection of Several Homologous MicroRNAs by a Single Smart Probe System Consisting of Linear Nucleic Acid Blockers
Source: MDPI journal article supplement (doi:10.3390/molecules24203691), 2019-10-14
Supplement: s1 [file s1]

**Supplementary Material for**  
**Detection of Several Homologous MicroRNAs by a Single Smart**  
**Probe System Consisting of Linear Nucleic Acid Blockers**

Sulayman A. Oladepo\* and Basiru O. Yusuf

*Department of Chemistry, King Fahd University of Petroleum and Minerals,*

*Dhahran 31261, Kingdom of Saudi Arabia*

\* Corresponding author: (voice): +966 13 860 7103; (fax): +966 13 860 4277; (e-mail):

[saoladepo@kfupm.edu.sa](mailto:saoladepo@kfupm.edu.sa)

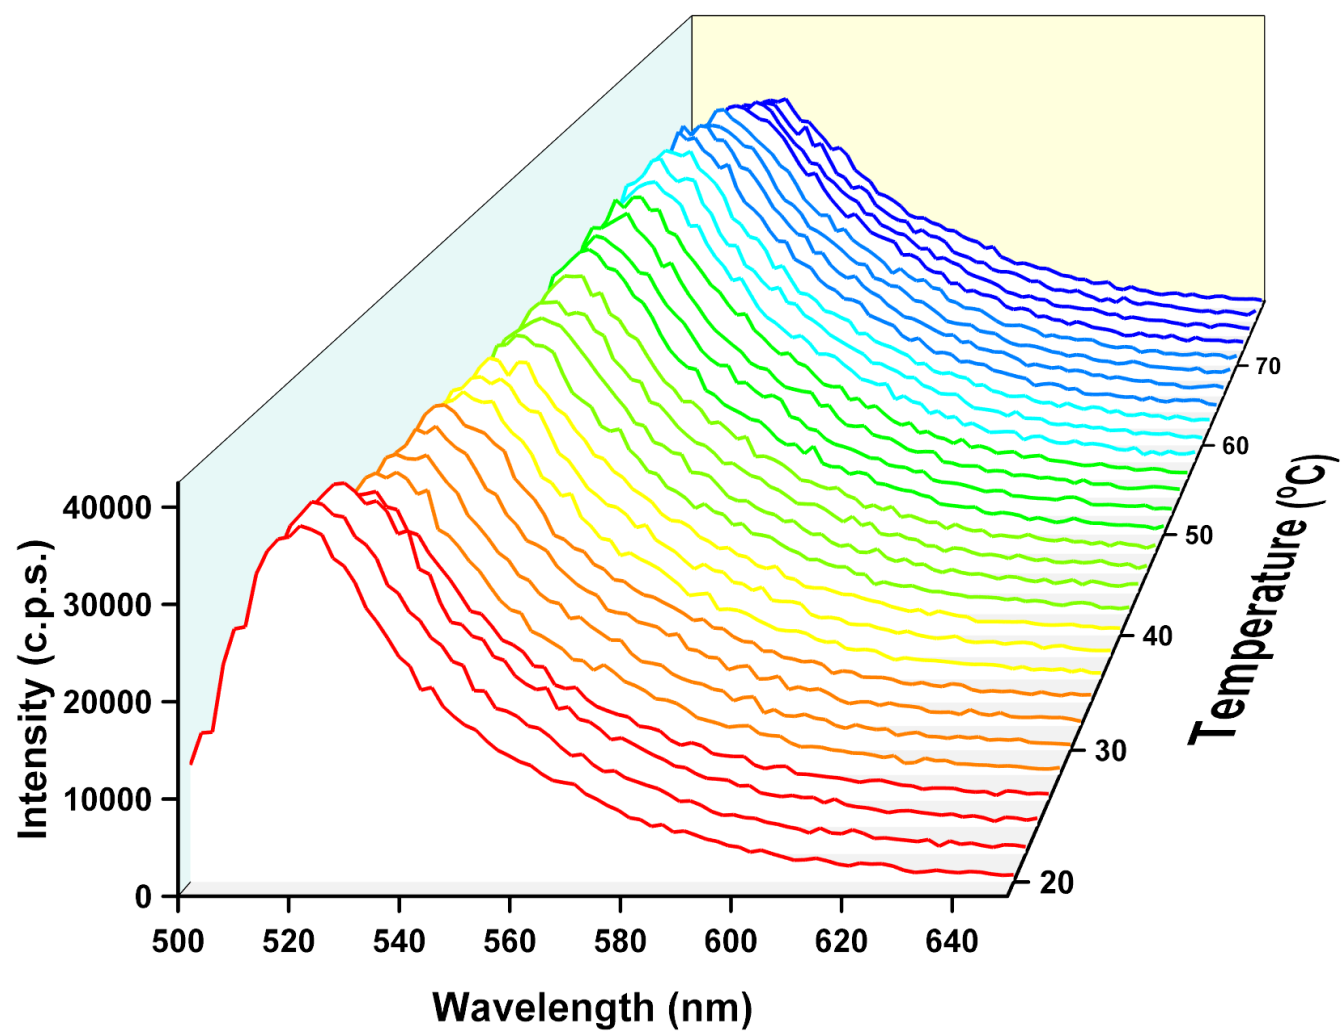

**Figure S1.** Raw fluorescence spectra of SP only (red curve in Figures 2, 3 and 5 of the main text and Figure S7 below).

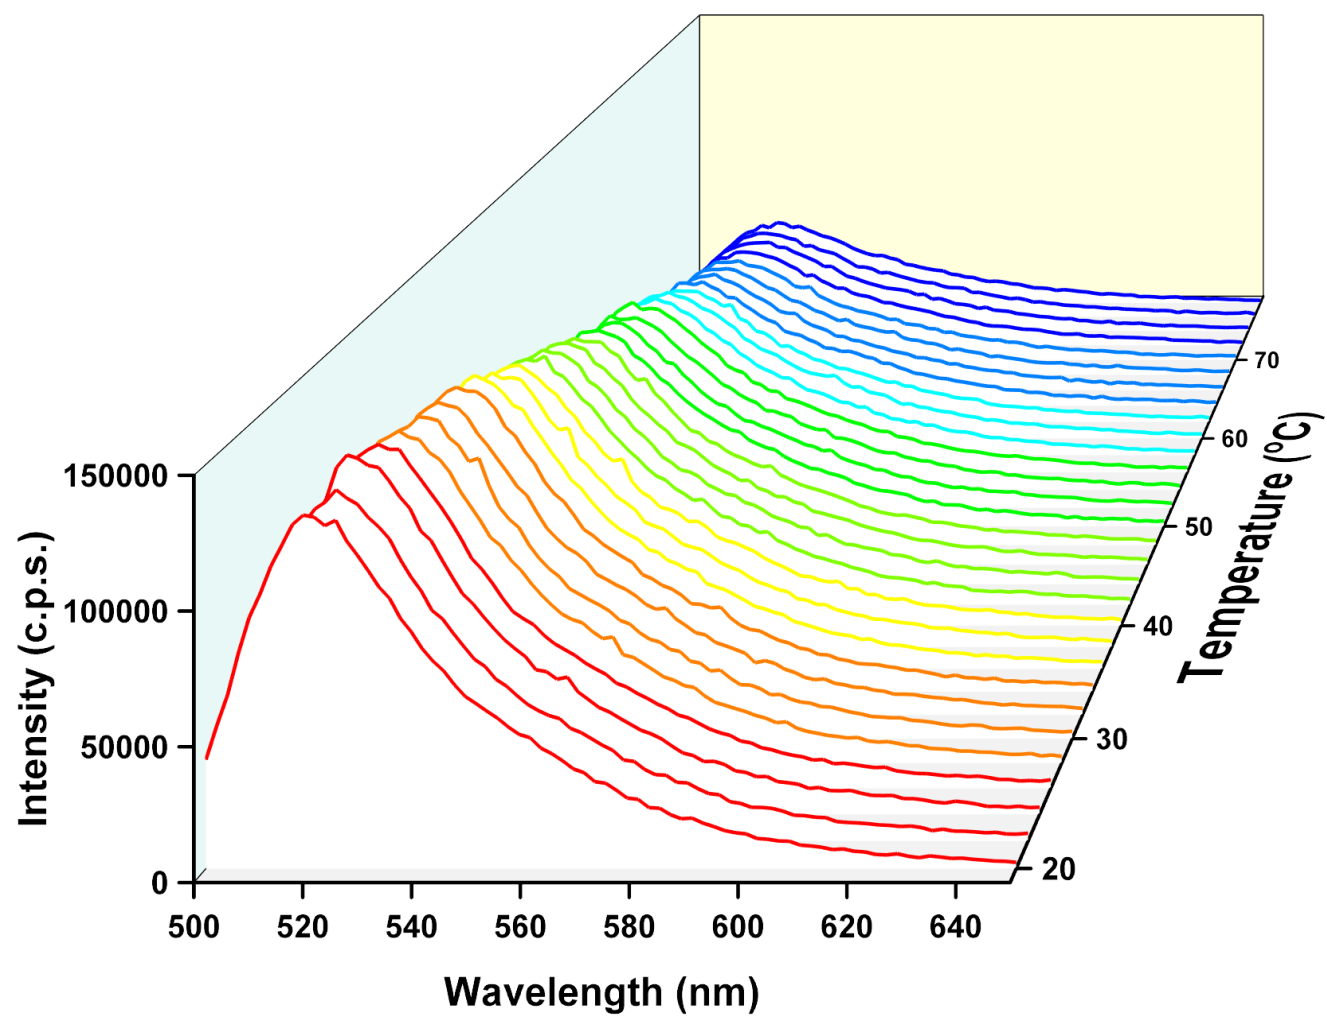

**Figure S2.** Raw fluorescence spectra of SP-L7a hybrid (black curve in Figures 2, 3 and 5 of the main text).

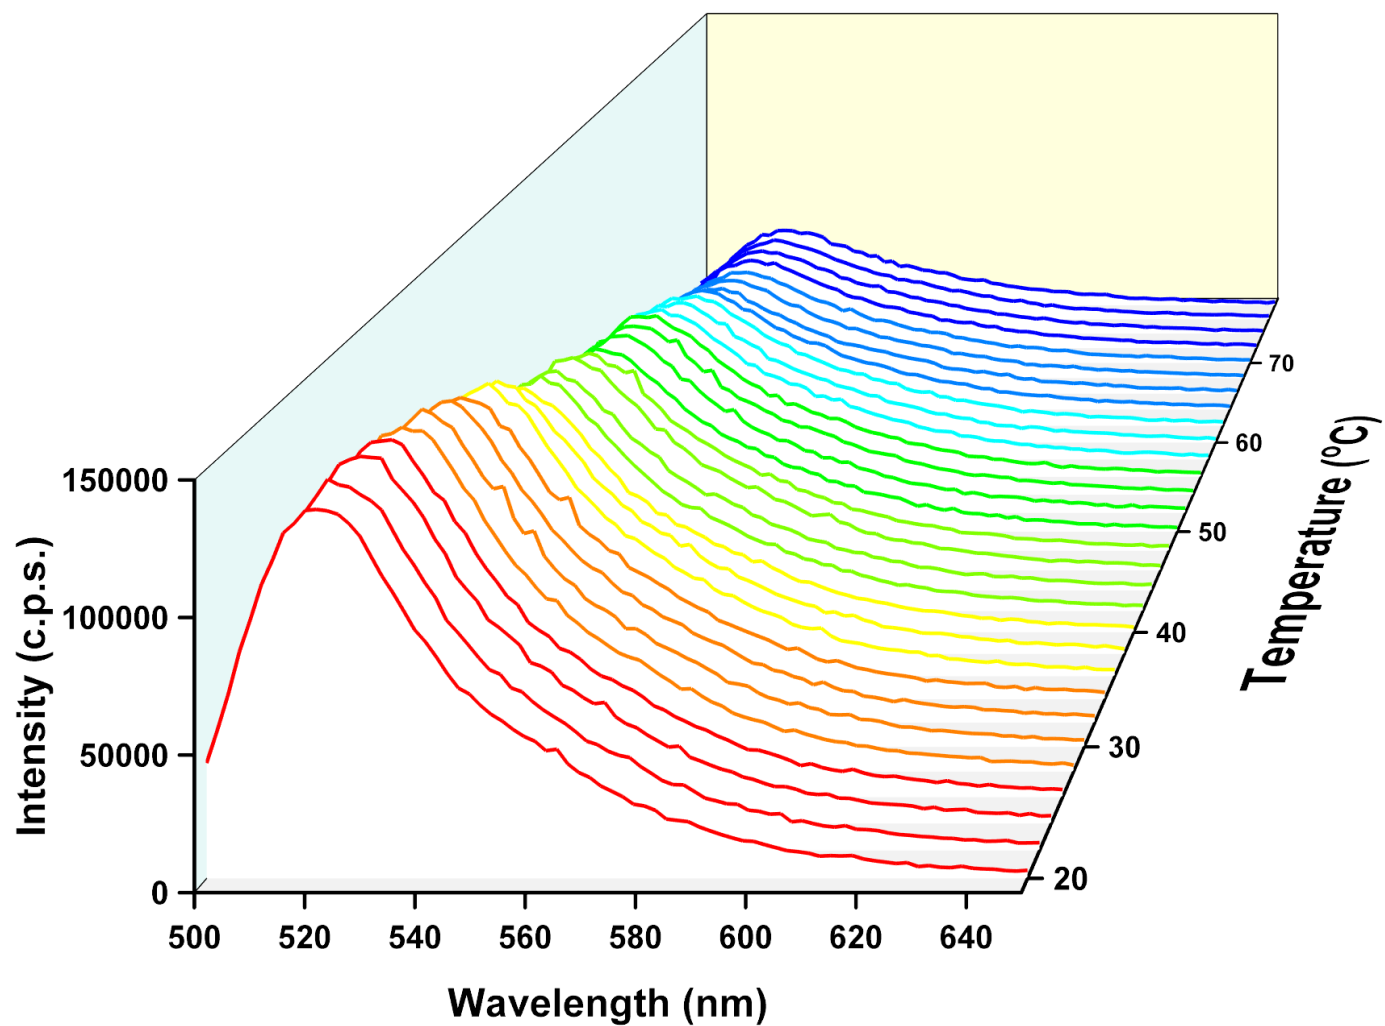

**Figure S3.** Raw fluorescence spectra of SP-L7b (magenta curve in Figure 3 of the main text).

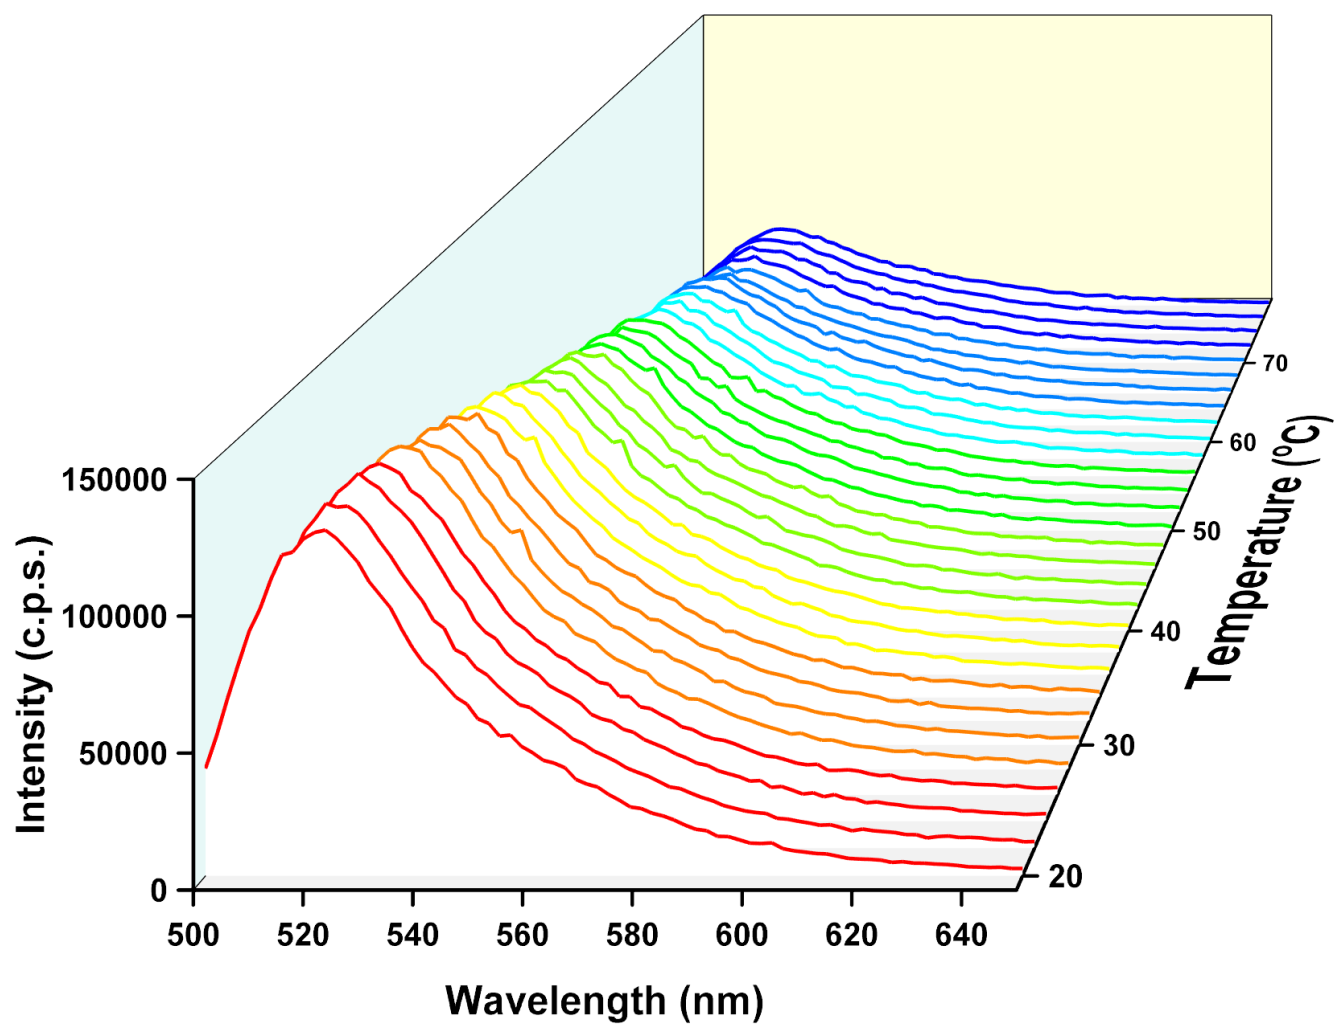

**Figure S4.** Raw fluorescence spectra of SP-L7c (blue curve in Figure 3 of the main text).

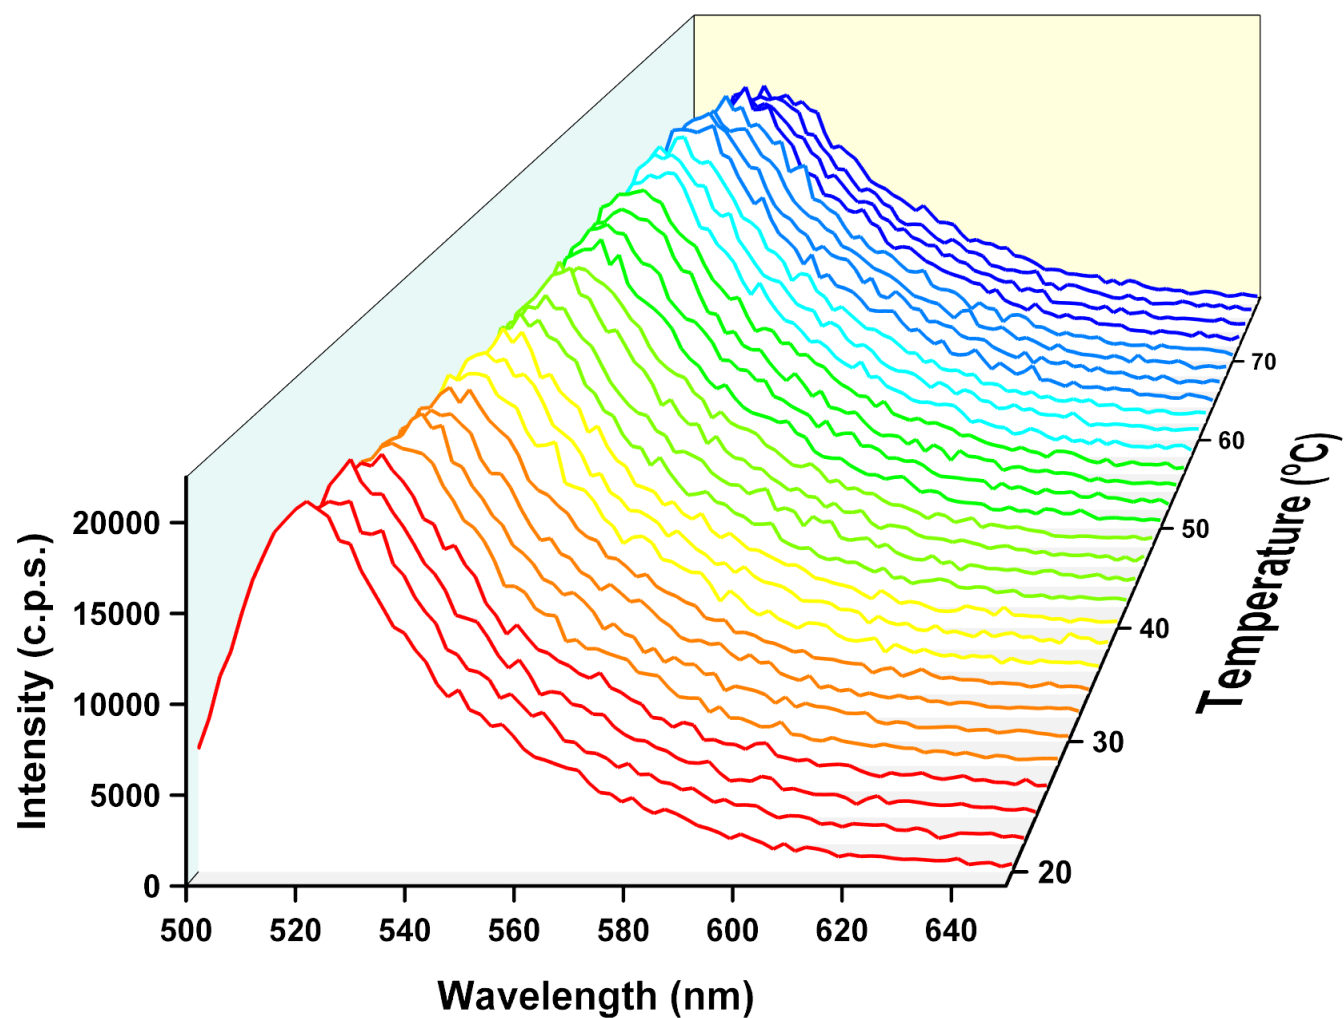

**Figure S5.** Raw fluorescence spectra of SP/L7b-LNABb (magenta curve in Figure 5 of the main text and Figure S7 below).

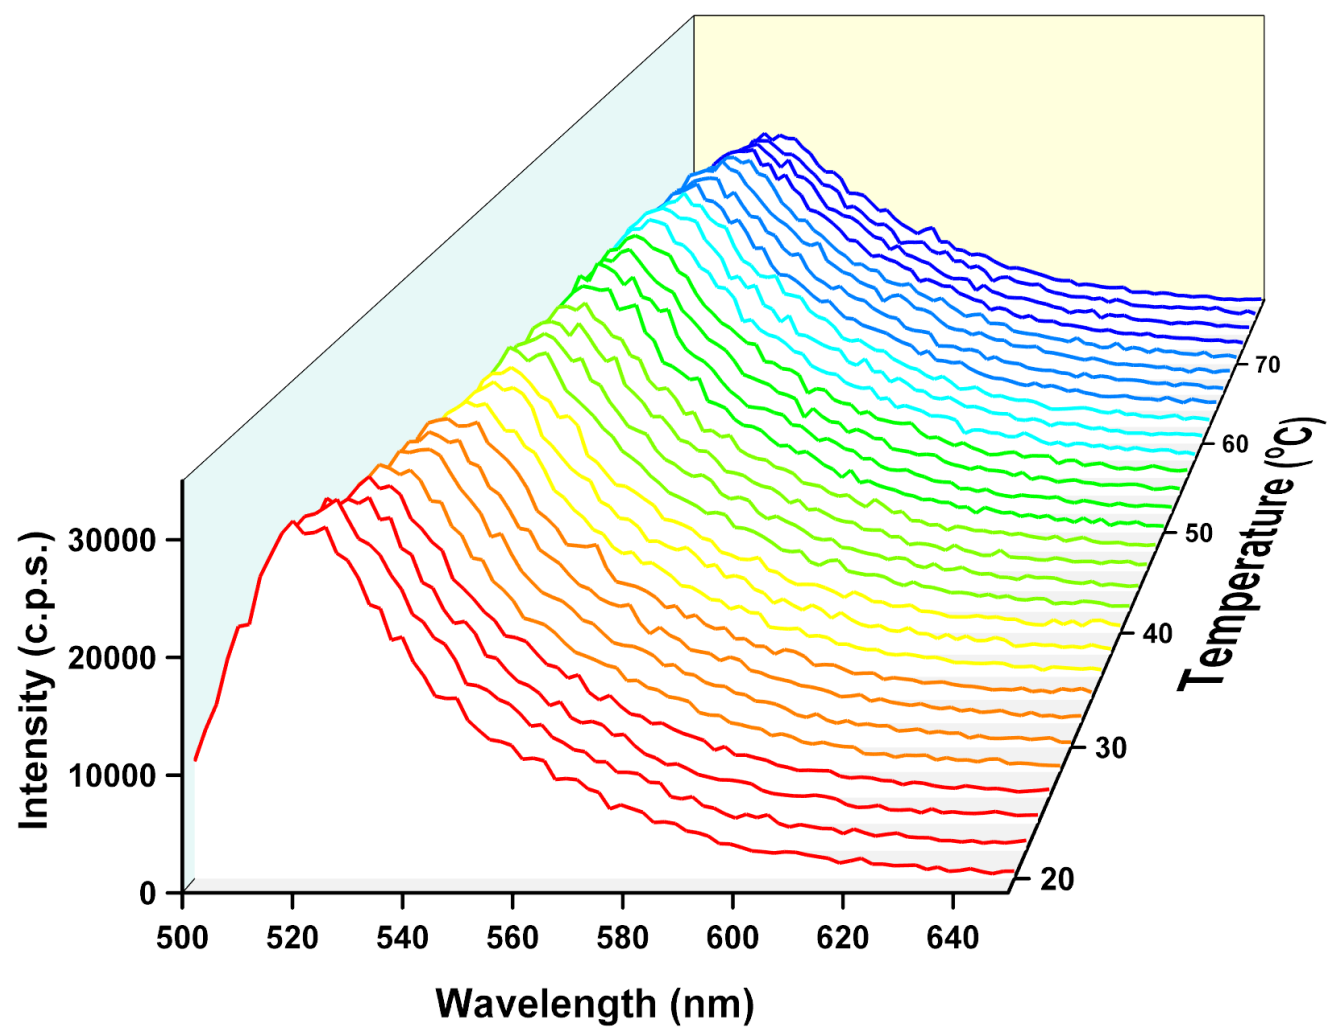

**Figure S6.** Raw fluorescence spectra of SP/L7c-LNABc (blue curve in Figure 5 of the main text and Figure S7 below).

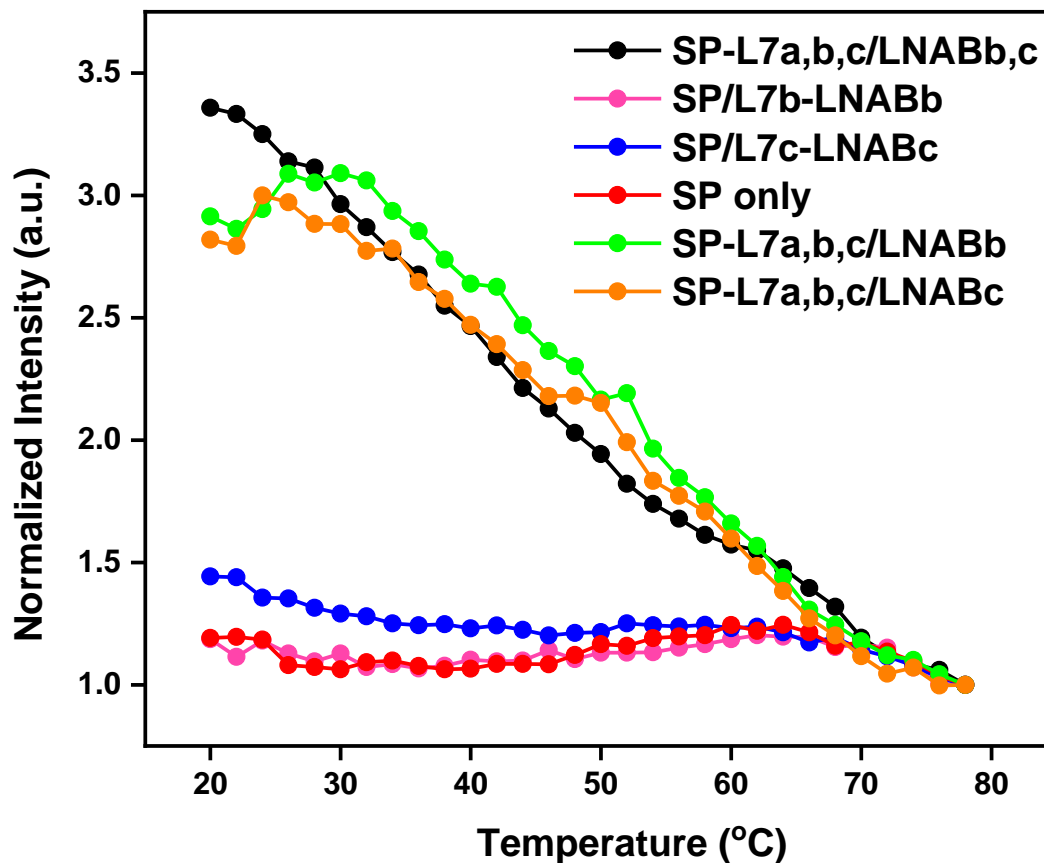

**Figure S7.** Melting profiles of SP-L7a hybrid in the presence of L7b, L7c, and their corresponding nucleic acid blockers, LNABb and LNABc. SP-L7a,b,c/LNABb,c, represents SP-L7a hybrid in the presence of homologous ‘mismatch’ sequences L7b and L7c and their respective blockers, NABb and NABc. SP-L7a,b,c/LNABb represents SP-L7a hybrid in the presence of L7b and L7c and NABb, while SP-L7a,b,c/LNABc represents SP-L7a hybrid in the presence of L7b and L7c and NABc. In all cases, the signal intensity of SP-L7a,b,c, is similar to SP-L7a in Figure 2, Figure 3 and Figure 5 of the main text. This suggests little or no hybridization between L7a and NABs, while the signals of SP/L7b-NABb and SP/L7c-NABc hybrids are essentially the same as that of SP alone.



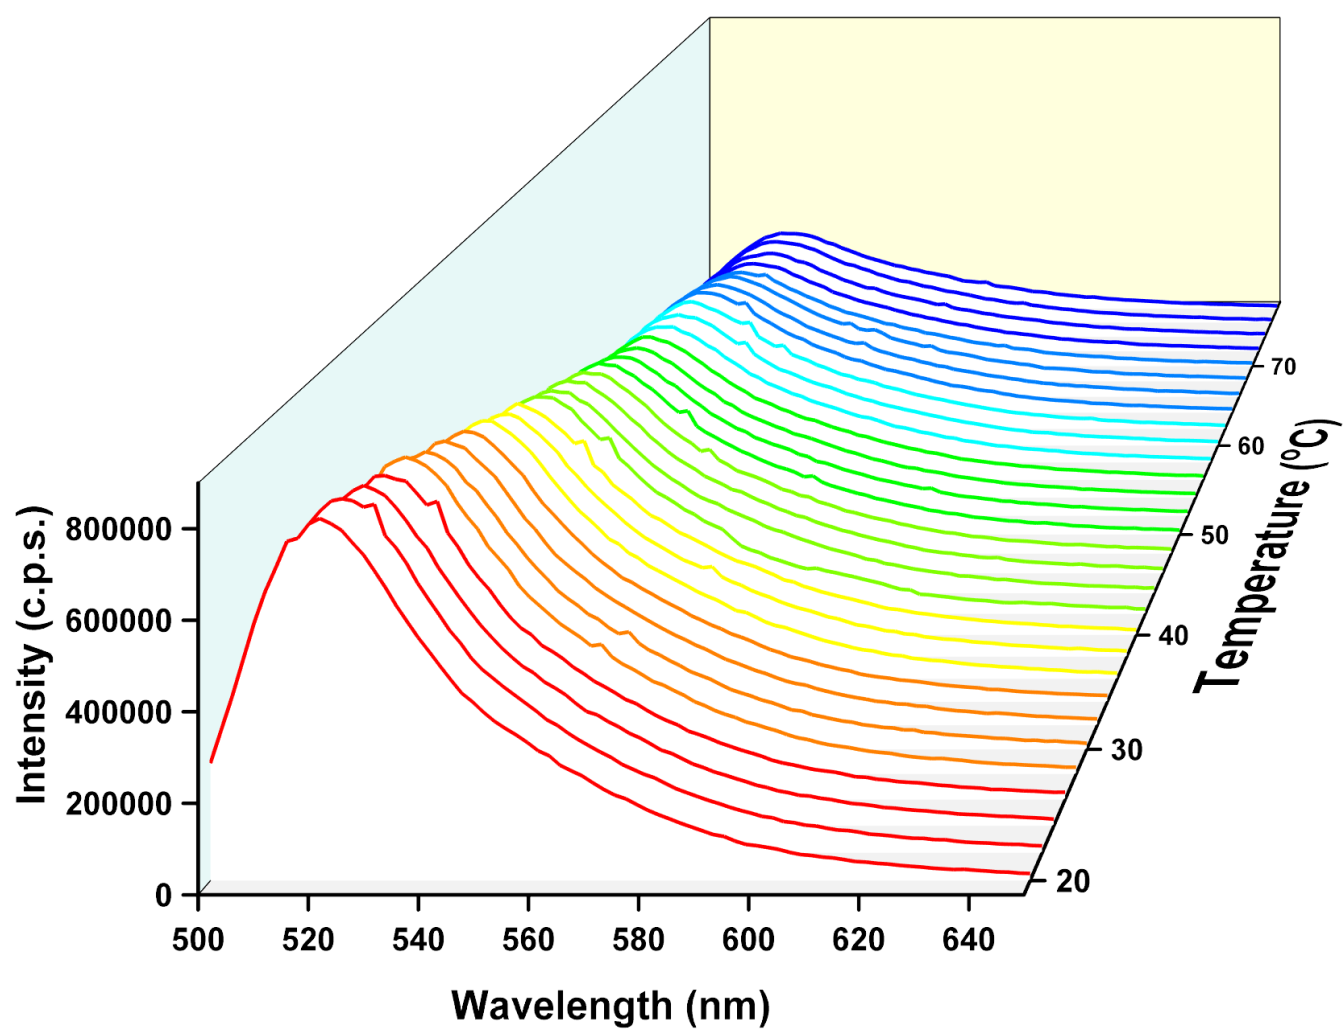

**Figure S8.** Raw fluorescence spectra of SP-L7a hybrid in the presence of L7b, L7c, and their corresponding nucleic acid blockers, LNABb and LNABc (black curve in Figure S7).

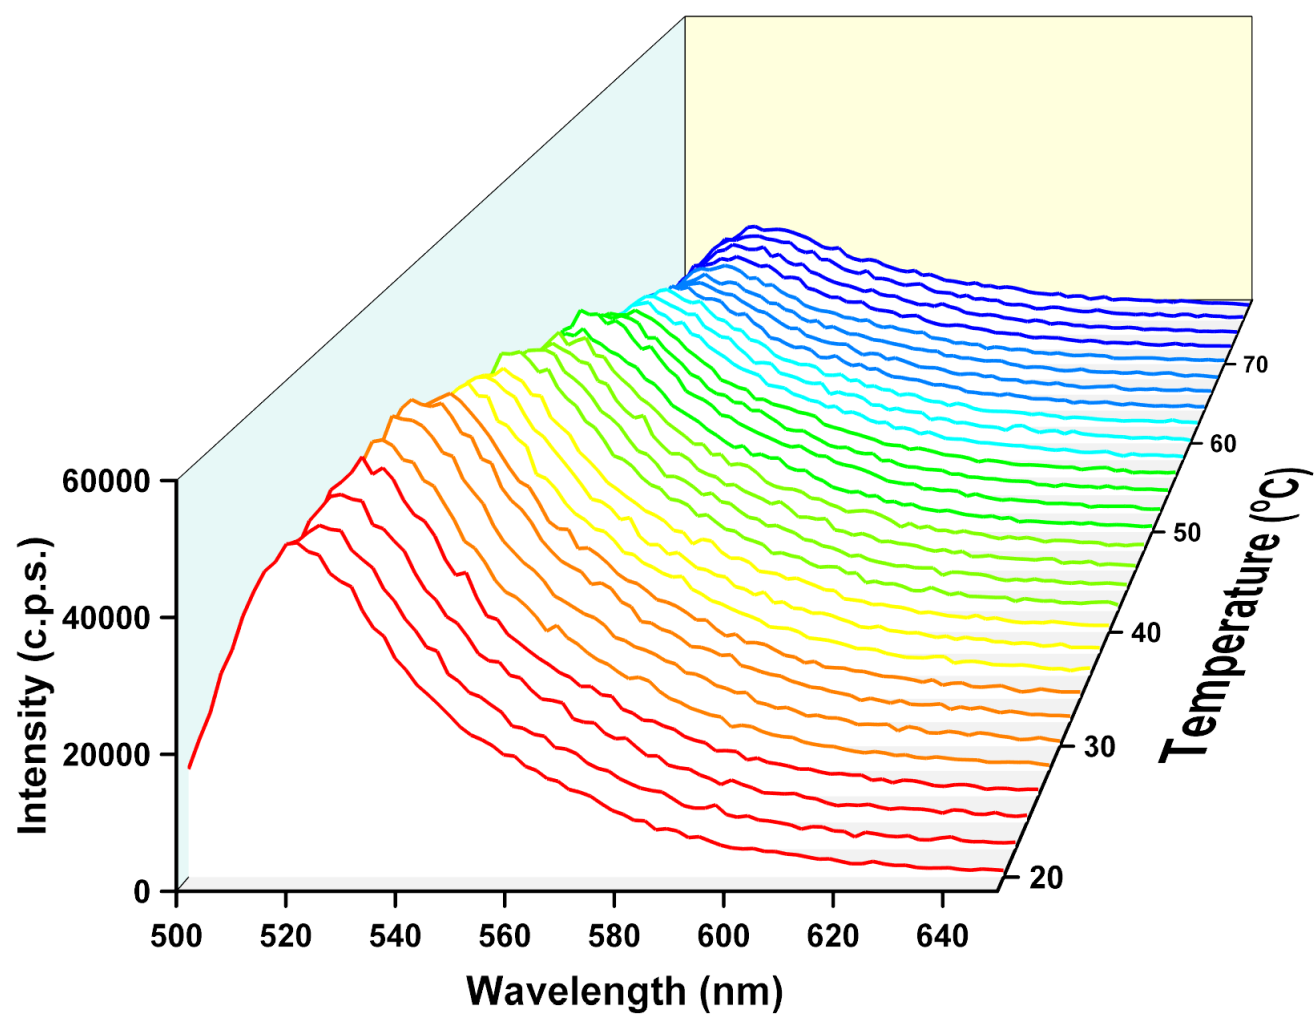

**Figure S9.** Raw fluorescence spectra of SP-L7a hybrid in the presence of L7b, L7c, and LNABb (green curve in Figure S7).

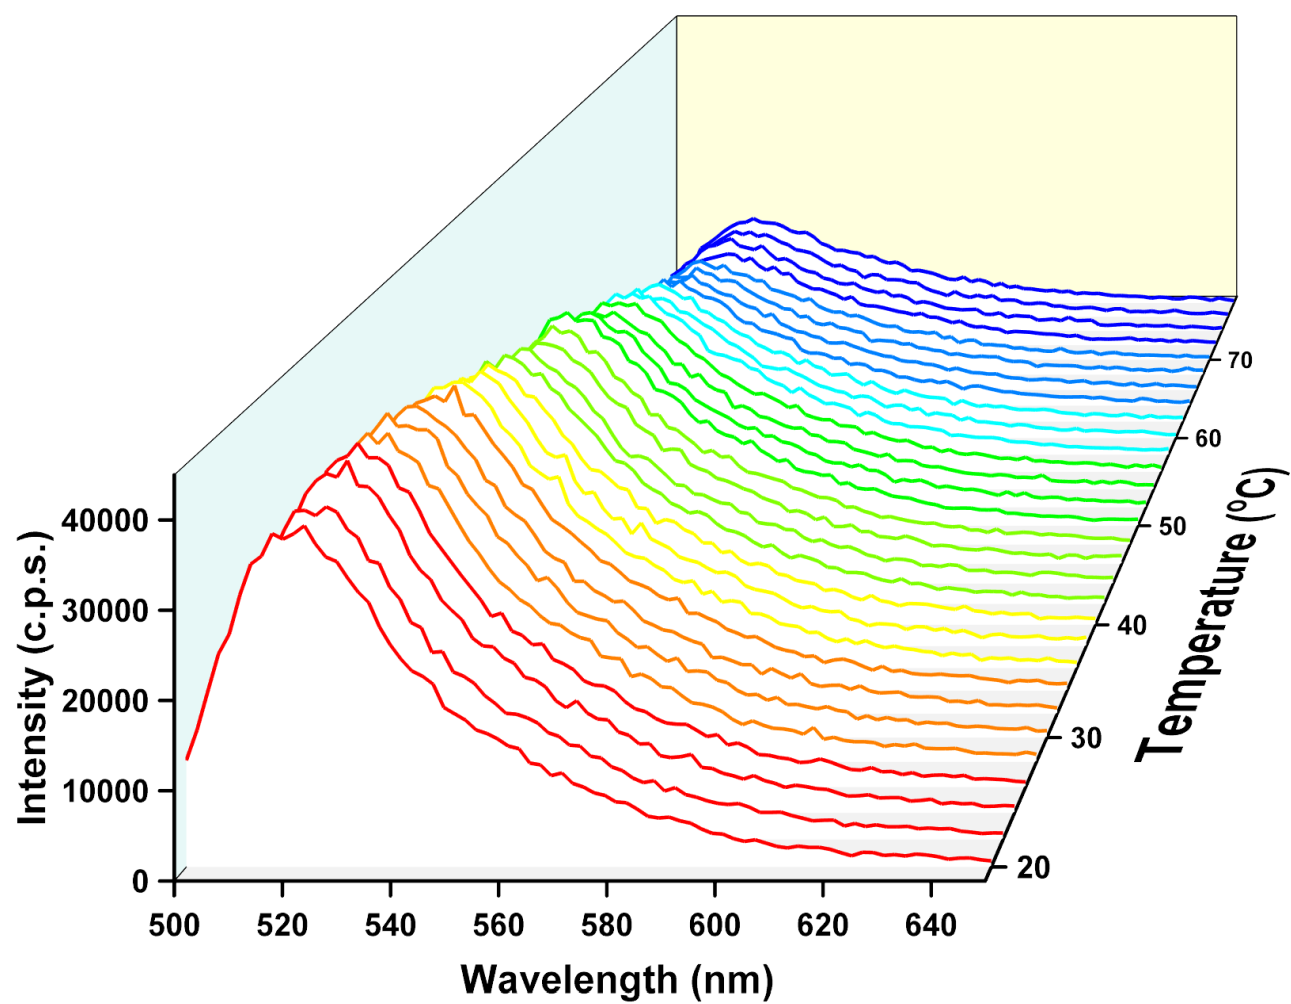

**Figure S10.** Raw fluorescence spectra of SP-L7a hybrid in the presence of L7b, L7c, and LNABc (orange curve in Figure S7).

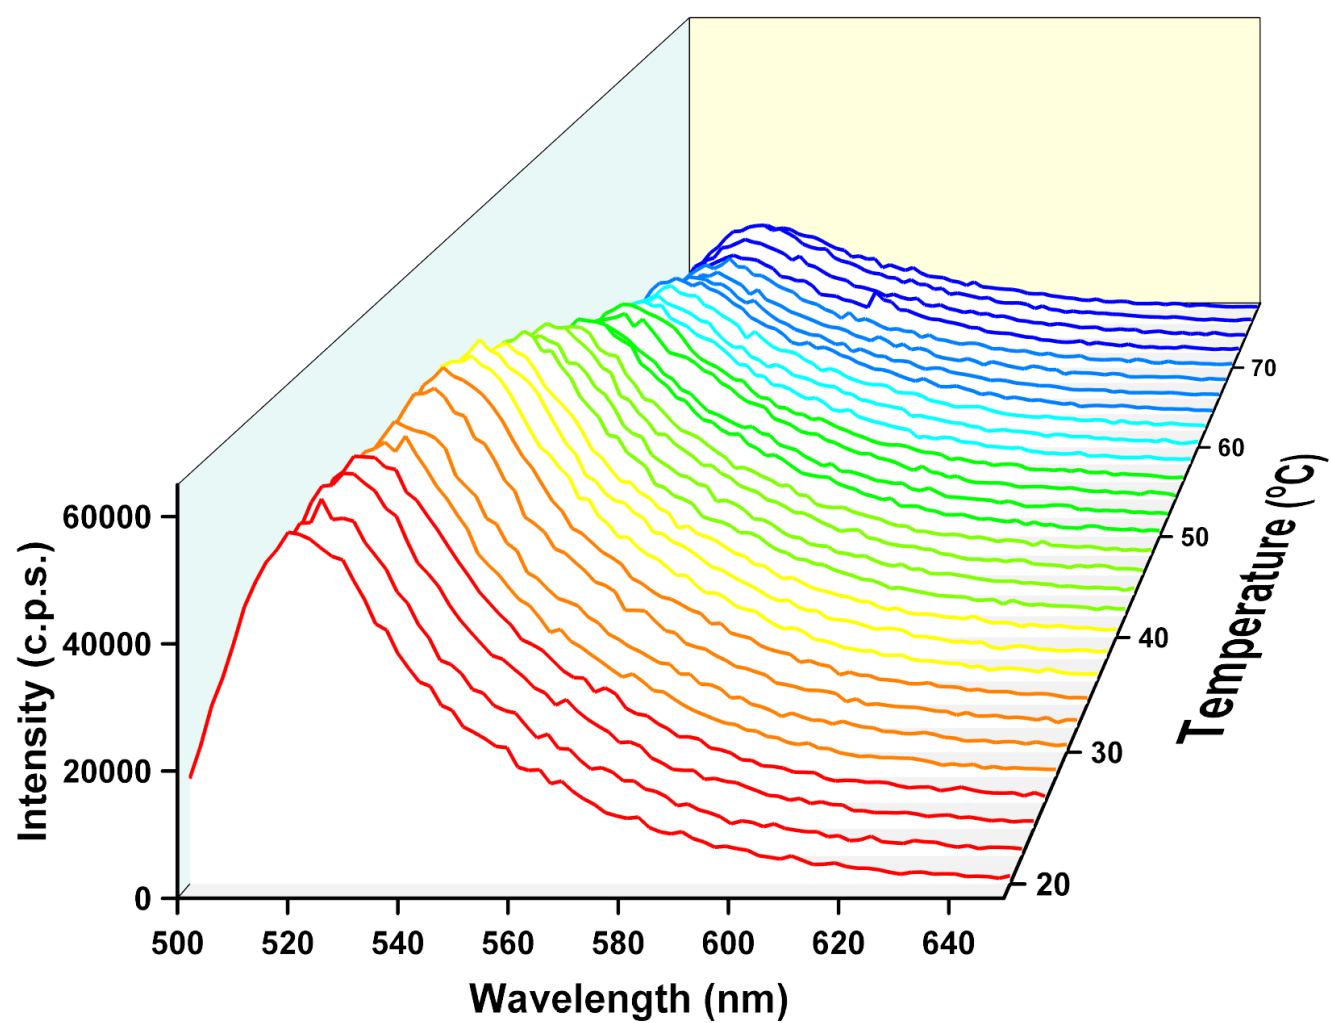

**Figure S11.** Raw fluorescence spectra of SP-L7a hybrid in the presence of LNABb (green curve in Figure 5 of the main text).

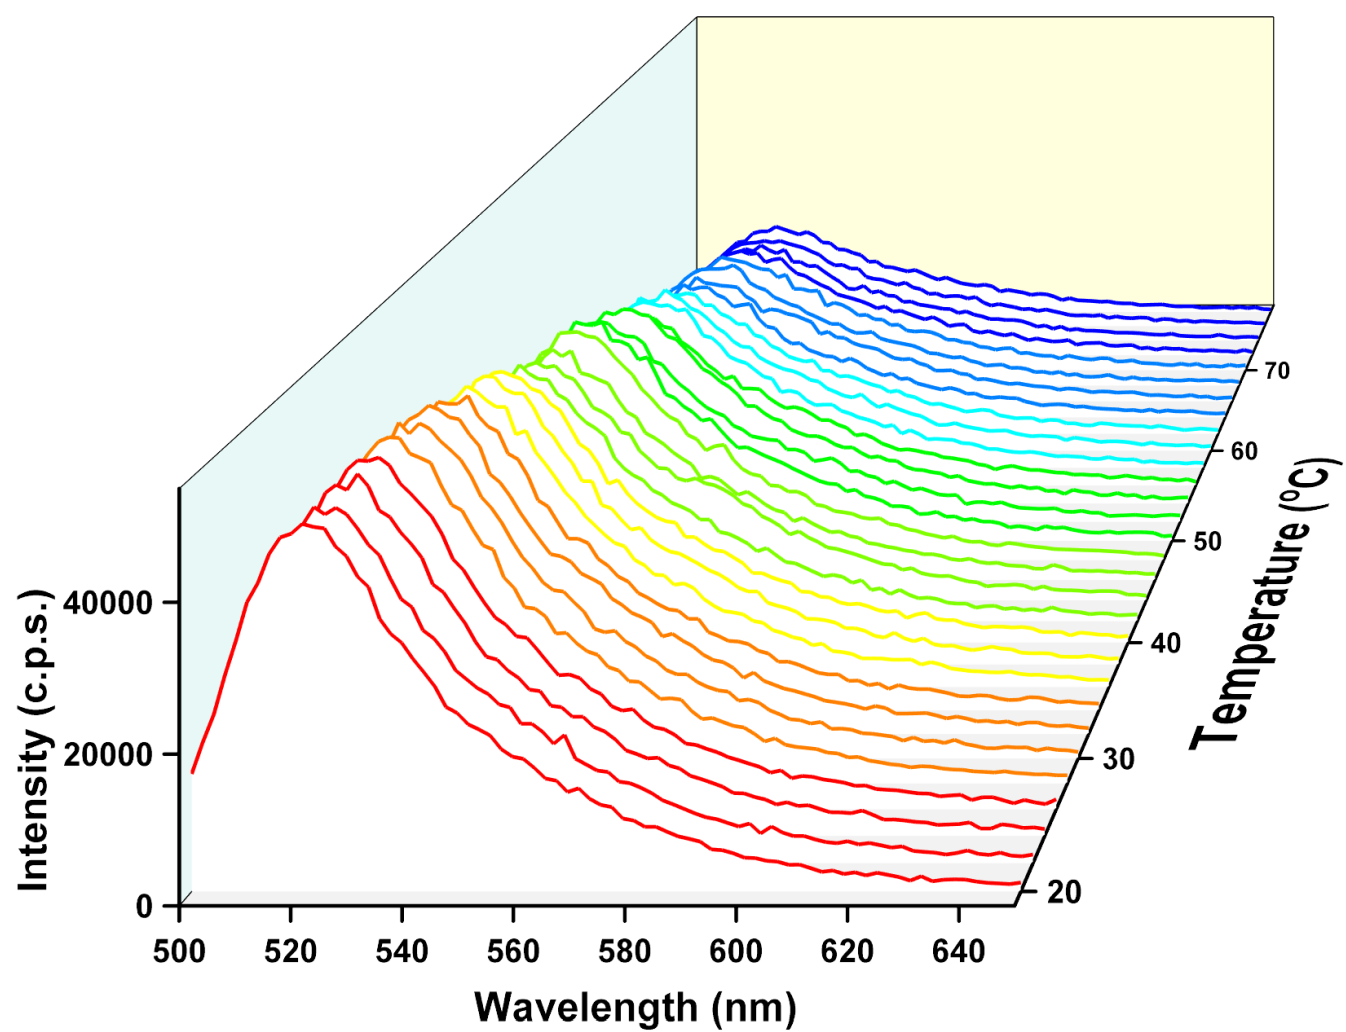

**Figure S12.** Raw fluorescence spectra of SP-L7a hybrid in the presence of LNABc (brown curve in Figure 5 of the main text).

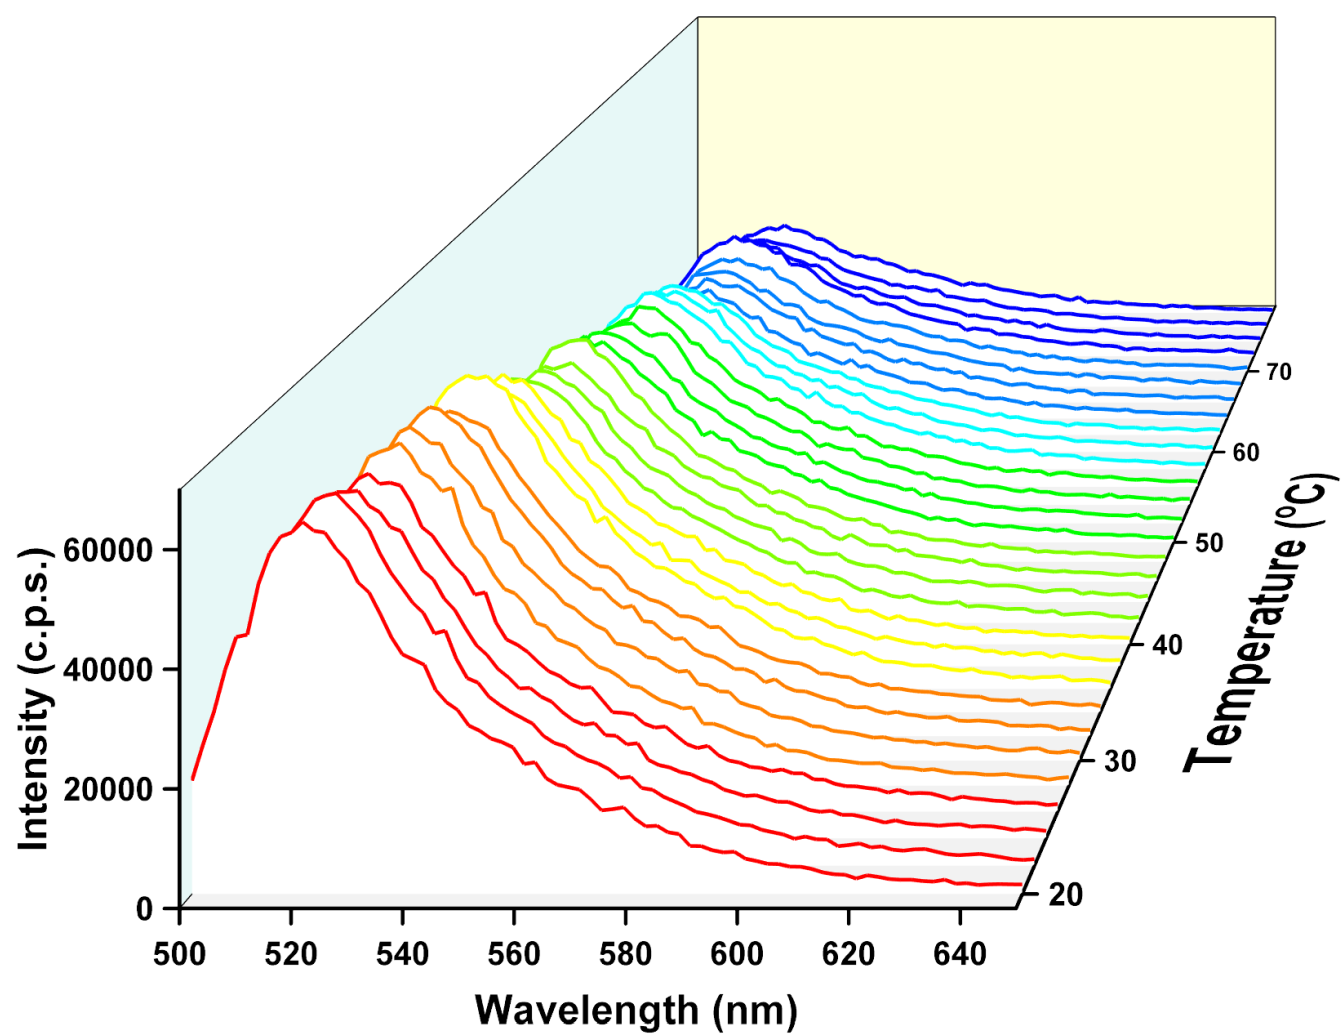

**Figure S13.** Raw fluorescence spectra of SP-L7b hybrid in the presence of LNABc (orange curve in Figure 5 of the main text).

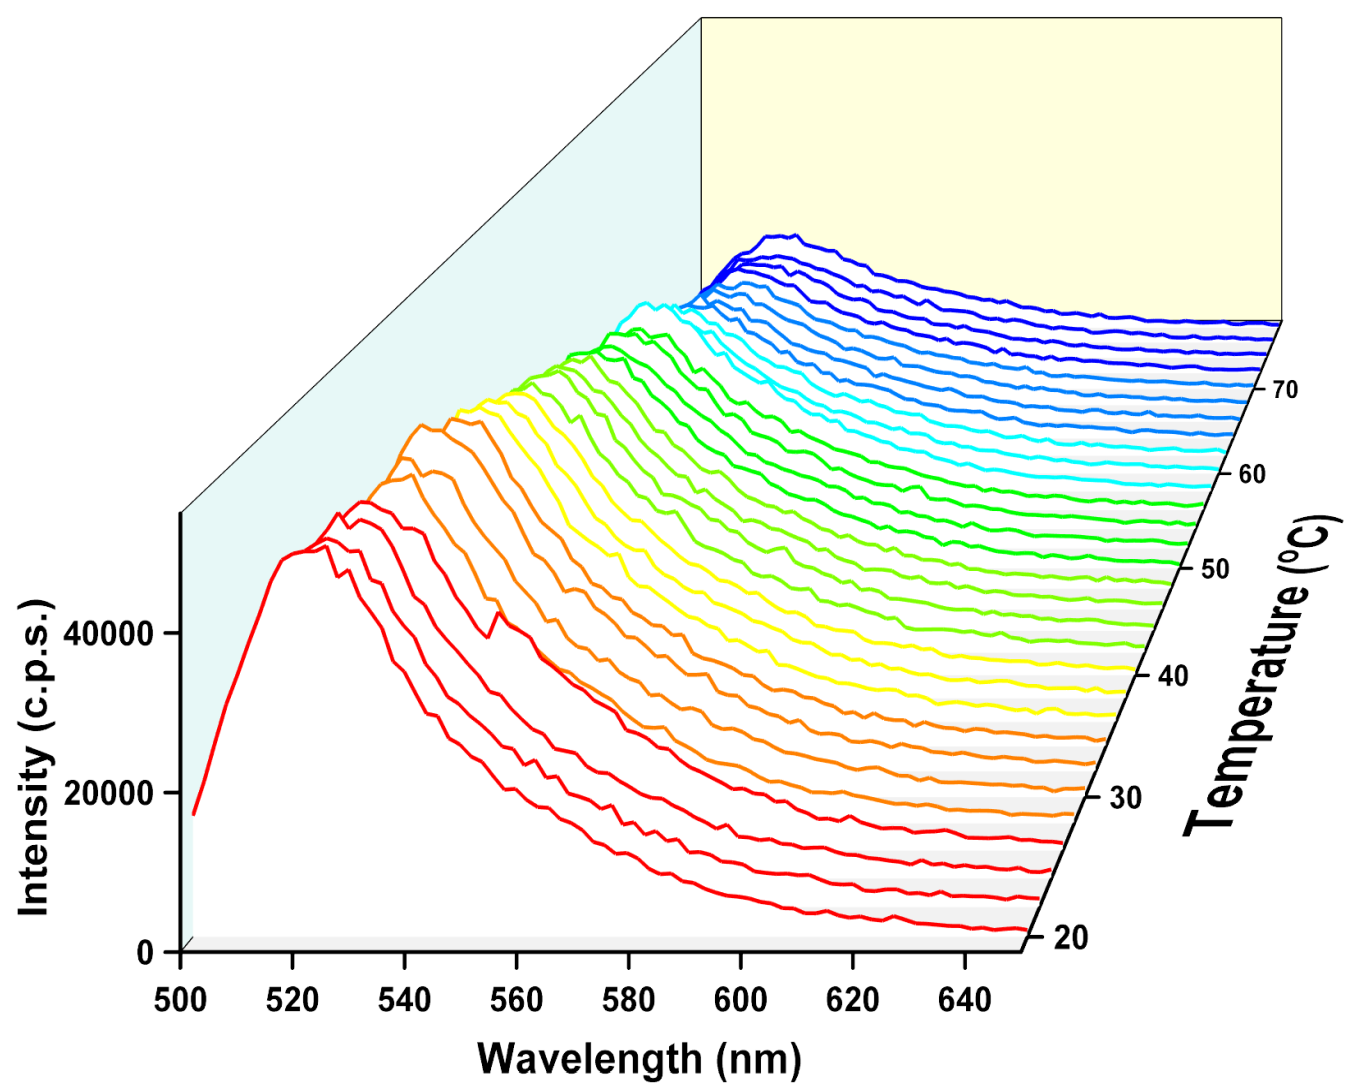

**Figure S14.** Raw fluorescence spectra of SP-L7c hybrid in the presence of LNABb (cyan curve in Figure 5 of the main text).

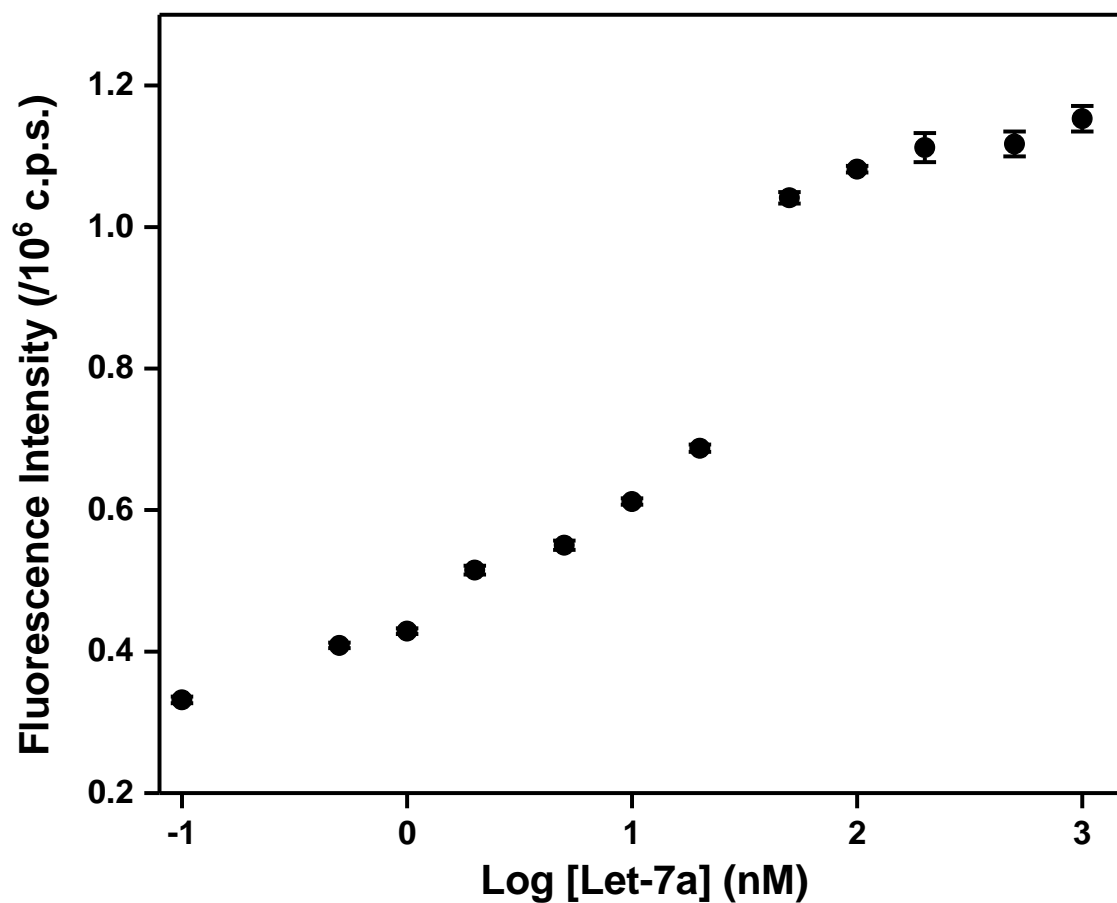

**Figure S15.** Full concentration-dependent curve for 100 nM SP in the presence of varying concentrations of L7a (0-1000 nM). Fluorescence signal reaches a plateau around 100 nM PM concentration, signifying the expected 1:1 hybridization ratio of SP with L7a target sequence. The linear portion of this curve is shown in Figure 6 of the main text.



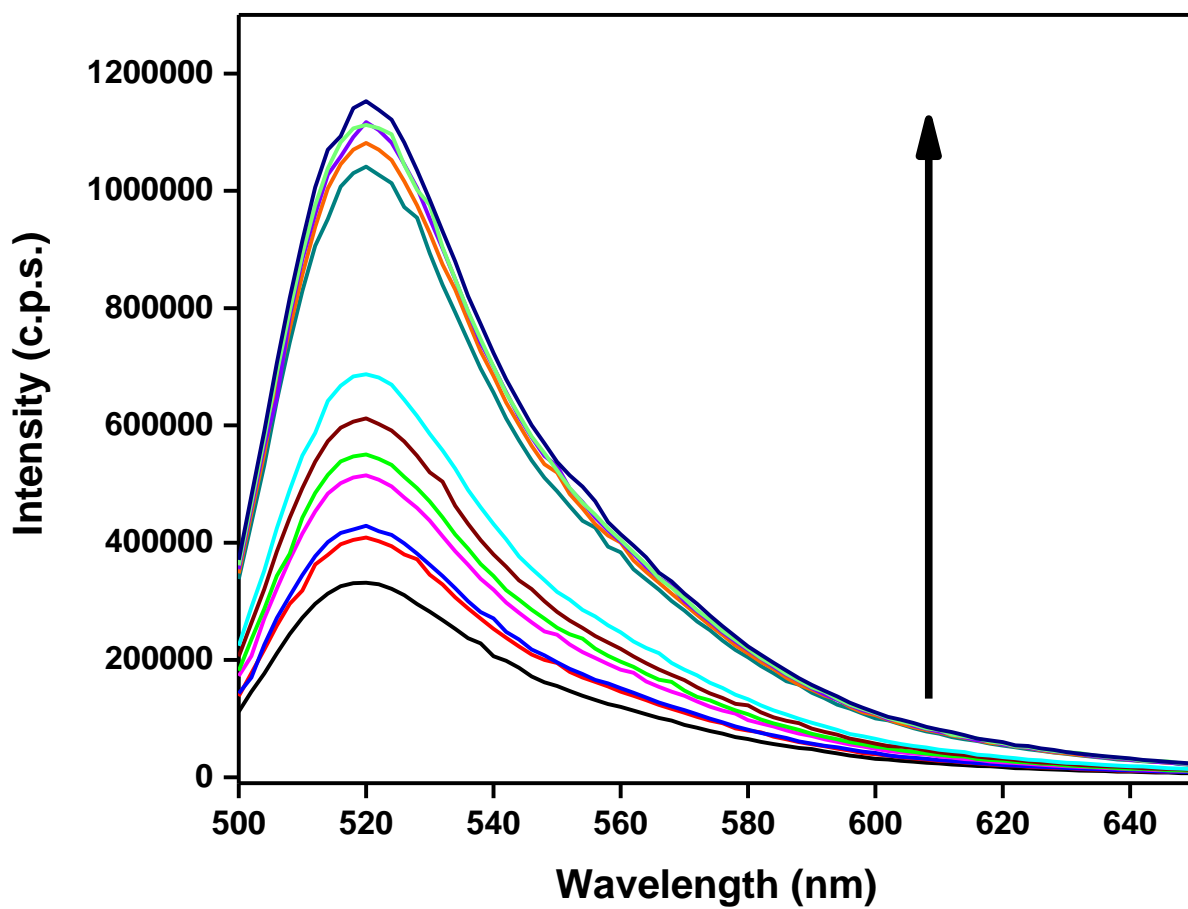

**Figure S16.** Raw fluorescence spectra of concentration-dependent curve of Figure S15.
